# Supplementary material for: Can prediabetes diagnosed using HemoglobinA1c or oral glucose tolerance test predict presence and severity of coronary artery disease in symptomatic patients?
Source: PubMed Central journal article supplement — Diab Vasc Dis Res. 2023 Jun 21;20(3):14791641231179870. doi: 10.1177/14791641231179870 (PMC10288424; doi:10.1177/14791641231179870), 2023-06-21
Supplement: sj-pdf-1-dvr-10.1177_14791641231179870.pdf [file sj-pdf-1-dvr-10.1177_14791641231179870.pdf]

## Supplementary material

**Table S1:**  
**Logistic regression of CCTA outcomes for the subgroup with combined HbA1c and OGTT-prediabetes**

|                               | CAC=0                   | CAC>0                   | CAC>400                 | Plaque presence  | Significant stenosis    | Plaque characteristics |                  |
|-------------------------------|-------------------------|-------------------------|-------------------------|------------------|-------------------------|------------------------|------------------|
|                               |                         |                         |                         |                  |                         | <i>Soft</i>            | <i>Calcified</i> |
| <b>HbA1c + OGTT</b>           |                         |                         |                         |                  |                         |                        |                  |
| HbA1c<39 (<5.7%) or NGS (ref) | ...                     | ...                     | ...                     | ...              | ...                     | ...                    | ...              |
| Model 1                       | <b>0.6</b><br>(0.4;0.9) | <b>1.7</b><br>(1.1;2.8) | <b>2.2</b><br>(1.3;3.6) | 1.5<br>(0.9;2.4) | <b>1.9</b><br>(1.1;3.1) | 1.1<br>(0.7;1.8)       | 1.4<br>(0.9;2.1) |
| Model 2                       | 0.7<br>(0.4;1.1)        | 1.5<br>(0.9;2.5)        | <b>1.9</b><br>(1.1;3.3) | 1.5<br>(0.9;2.4) | <b>1.7</b><br>(1.0;2.9) | 1.0<br>(0.6;1.8)       | 1.3<br>(0.9;2.0) |

Logistic regression analysis was used to estimate OR and 95% confidence interval (CI).

Model 1 adjusted for age and sex.

Model 2 adjusted for age, sex, body mass index, smoking status, antihypertensive- and lipid-lowering medication.

CAC= Coronary Artery Calcium, HbA1c= HemoglobinA1c, OGTT= Oral Glucose Tolerance Test, NGS= Normal glycemic status.

**Table S2:**  
**Sensitivity analysis with assumptions of plaque and stenosis presence when coronary artery calcium exceeds >1000**

|                | Plaque presence         | Significant stenosis    |
|----------------|-------------------------|-------------------------|
| <b>HbA1c</b>   |                         |                         |
| HbA1c<39 (ref) | ...                     | ...                     |
| Model 1        | <b>1.6</b><br>(1.1;2.5) | <b>1.9</b><br>(1.2;3.0) |
| Model 2        | <b>1.6</b><br>(1.0;2.4) | <b>1.8</b><br>(1.1;2.9) |
| <b>OGTT</b>    |                         |                         |
| NGS (ref)      | ...                     | ...                     |
| Model 1        | <b>1.3</b><br>(0.9;2.0) | <b>1.9</b><br>(1.0;3.3) |
| Model 2        | <b>1.3</b><br>(0.9;2.0) | <b>1.7</b><br>(0.9;3.1) |

Logistic regression analysis was used to estimate OR and 95% confidence interval (CI).

Model 1 adjusted for age and sex.

Model 2 adjusted for age, sex, body mass index, smoking status, antihypertensive- and lipid-lowering medication.

HbA1c= HemoglobinA1c, **OGTT=Oral Glucose Tolerance Test**, NGS= Normal glycemic status.

Figure S3

Scatter plot of CAC-score vs glycemic values

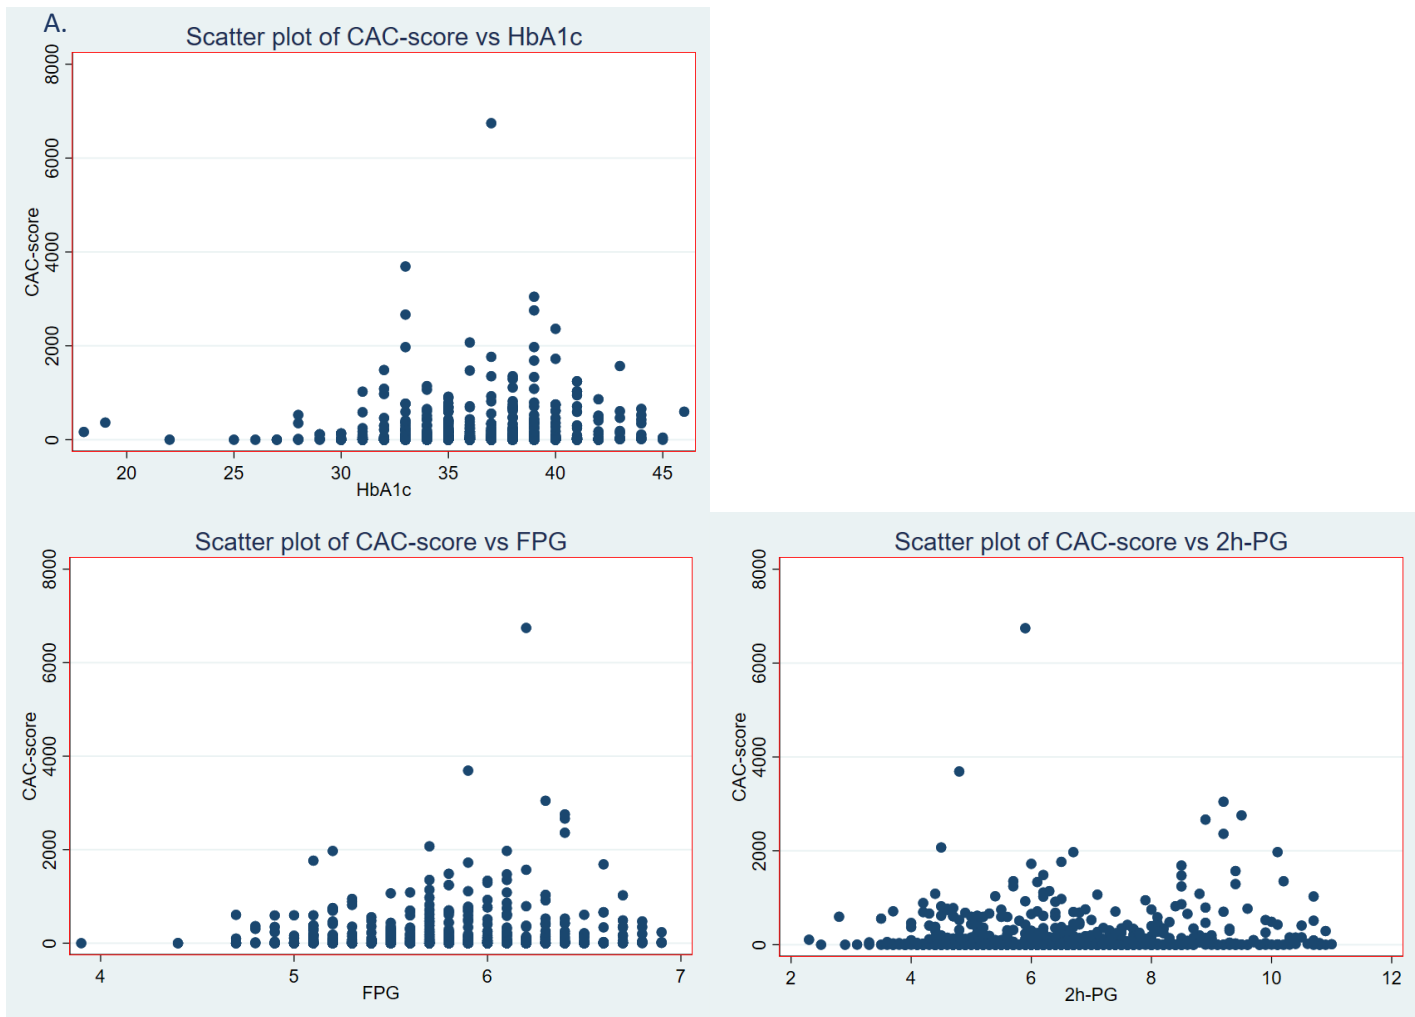

B.

Figure 5 displays the scatter plots of CAC-score vs the various glycemic values given in mmol/mol. Values for PG given in mmol/L. HbA1c=

FPG= Fasting Plasma Glucose, 2h-PG= 2 hour Plasma Glucose, IFG= Impaired Fasting Glucose, IGT= Impaired Glucose Tolerance

C.

values. A. HbA1c, B. FPG, C. 2h-PG. Values for HbA1c HemoglobinA1c, OGTT= Oral Glucose Tolerance Test,
